23  
24  
25  
26  
27  
28  
29  
30  
31  
32  
33  
34  
35

### Key Points

**Question:** Can a large regional health system leverage the electronic health record to analyze hypertension trends and disparities to drive improvement?

**Findings:** We analyzed 1,376,325 patients over 12 years and found that age-adjusted hypertension prevalence increased by approximately 5%. Age-adjusted hypertension control rates were in the 70% range and remained stable. Non-Hispanic Black patients represented 25% of our specific regional population and had 12-14% higher hypertension prevalence rates, higher mean age-adjusted systolic and diastolic blood pressure, and lower hypertension control rates compared with other racial groups.

**Meaning:** Real world data can provide actionable insights about hypertension and disparities in a specific region that could inform regional system strategies and initiatives for improvement.

36  
37  
38  
39  
40  
41  
42  
43  
44  
45  
46  
47  
48  
49  
50  
51  
52  
53  
54  
55  
56  
57

## Abstract

**Background:** The digital transformation of medical data enables health systems to leverage real-world data (RWD) from electronic health records (EHR) to gain actionable insights for improving hypertension care.

**Methods:** We performed a serial cross-sectional analysis of outpatients of a large regional health system from 2010 to 2021. Hypertension was defined by systolic blood pressure (SBP)  $\geq 140$  mmHg or diastolic blood pressure (DBP)  $\geq 90$  mmHg or recorded treatment with anti-hypertension medications. We evaluated four methods of using blood pressure measurements in the EHR to define hypertension.

The primary outcomes were age-adjusted prevalence rates and age-adjusted control rates. Secondary outcomes were age-adjusted mean SBP and DBP and age-adjusted proportion of patients with a searchable diagnosis code of hypertension in the EHR.

**Results:** Hypertension prevalence varied depending on the definition used, ranging from 36.5% to 50.9% initially and increasing over time by approximately 5%, regardless of the definition used. Control rates ranged from 61.2% to 71.3% initially, rose during 2018-2019 and fell during 2020-2021. The proportion of patients with a hypertension diagnosis ranged from 45.5% to 60.2% initially and improved during the study period. Non-Hispanic Black patients represented 25% of our regional population and consistently had higher prevalence rates, higher mean SBP and DBP and lower control rates compared with other racial and ethnic groups.

**Conclusion:** In a large regional health system, we leveraged the EHR to provide real-world insights. The findings largely reflected national trends but showed distinctive regional demographics and findings. The findings have provided opportunities for improvement, with

- 58 prevalence increasing, a quarter of the patients not controlled, and marked disparities. This
- 59 approach could be emulated by regional health systems seeking to improve hypertension care.

1 **Introduction**

2 Hypertension is a persistent and challenging health problem in the United States,  
3 estimated to affect almost half of adult Americans.<sup>1</sup> Of patients with hypertension, approximately  
4 half have uncontrolled blood pressure (BP),<sup>2</sup> which disproportionately affects African  
5 Americans.<sup>2-4</sup> Improving the detection and treatment hypertension is a national priority and  
6 offers an important opportunity to modify the risk for cardiovascular disease and stroke and to  
7 address a major racial disparity.<sup>5</sup>

8 A 2014 advisory from the American College of Cardiology, American Heart Association  
9 and the US Centers for Disease Control and Prevention called for health system approaches for  
10 addressing hypertension.<sup>6</sup> System-wide strategies, along with improvements at the clinician and  
11 patient level, could help optimize BP control and effectively modify the risk associated with  
12 hypertension.<sup>6,7</sup> To help design health system strategies, more information is needed to  
13 characterize hypertension trends and identify opportunities for improvement at the regional  
14 health system level, ideally utilizing readily available real-world evidence from the electronic  
15 health record (EHR) systems.

16 There are opportunities to broaden the ways a regional health system might use EHR data  
17 to investigate hypertension. Converting EHR data into a common data model can provide a more  
18 agile analytical platform, which could enable a health system to take advantage of their long-  
19 term data, explore various analytical methods, and evaluate trends and demographics that may be  
20 unique to a health system's region. Analysis of data at the regional level could enable customized  
21 regional initiatives to improve hypertension care.

22 Accordingly, we leveraged the EHR from a large health system caring for a diverse  
23 population to evaluate performance in the care of patients with hypertension.<sup>8</sup> EHR data over 12

24 years were transformed into a harmonized and validated data set that has enabled a serial cross-  
25 sectional analysis of hypertension in a large regional population.<sup>9</sup> We specifically sought to  
26 identify trends using various operational hypertension definitions to investigate disparities and  
27 opportunities for improvement.

## 28 **Methods**

### 29 **Data Source**

30 This retrospective observational study was performed at a large non-profit integrated  
31 healthcare system in Virginia and Northeastern North Carolina. The system began using a  
32 centralized EHR system designed by the Epic Corporation in 2007. In 2021, the health system  
33 began extracting key clinical data from its EHR and transforming the data into a harmonized data  
34 platform using the Observational Medical Outcomes Partnership (OMOP) common data model  
35 version 5.3.<sup>9</sup>

### 36 **Study Population**

37 The overall study population consisted of all adult patients ( $\geq 18$  years old) who had at  
38 least 1 outpatient blood pressure reading recorded between January 1st, 2010, and December  
39 31st, 2021. Emulating the NHANES study,<sup>2</sup> we conducted a serial cross-sectional study by  
40 independently analyzing the data in 2-year cycles from 2010-2011 to 2020-2021. In contrast to  
41 the defined clinical protocols of NHANES, our real-world data approach required defining  
42 computational protocols to analyze recorded BP readings in the EHR to create operational  
43 definitions of hypertension.

44 BP readings were first analyzed at the visit level. If more than one BP reading was taken  
45 during a visit, the first reading was disregarded and the mean of the remaining BP readings from  
46 the visit defined the visit BP measurement. If multiple outpatient visits occurred for a patient on

47 a specific date, we calculated the mean of the visit BP measurements and used the mean as the  
48 visit BP measurement for that date.

### 49 **Definition of Hypertension**

50 In each 2-year cycle, a patient was classified as having hypertension according to the  
51 definitions listed below using either an elevated visit BP measurement, or use of at least one first  
52 line anti-hypertension medication recorded during the 2-year cycle, like NHANES.<sup>2</sup> BP elevation  
53 was defined as a systolic blood pressure (SBP)  $\geq 140$  mm Hg, or diastolic blood pressure (DBP)  
54  $\geq 90$  mm Hg. First-line anti-hypertension medications were defined according to the 2017  
55 AHA/ACC hypertension guideline<sup>10</sup> and are listed with their associated OMOP concept  
56 identification numbers in eTable 1.

57 We evaluated four operational hypertension definitions using four different methods for  
58 incorporating recorded BP measurement into the definition: 1) using at least one elevated visit  
59 BP measurement during a 2-year cycle, 2) using the first visit BP measurement during a 2-year  
60 cycle, 3) using a single randomly chosen visit BP measurement during a 2-year cycle, or 4) using  
61 at least two elevated visit BP measurements during a 2-year cycle. Our rationale for using these  
62 different operational hypertension definitions was to provide definitions that are comparable with  
63 other studies and guideline recommendations. For example, our third definition would be  
64 comparable to the NHANES study,<sup>2</sup> and our fourth definition would be comparable to the  
65 generally accepted guideline definition.<sup>10</sup>

66

### 67 **Definitions of Outcomes**

68 Primary outcomes were age-adjusted hypertension prevalence and age-adjusted rates of  
69 BP control during each 2-year cycle. BP control was defined at the patient level as a mean SBP <

70 140 mmHg and mean DBP < 90 mmHg during a 2-year cycle. To adjust for differences in age  
71 distribution among the 2-year study cycles, direct standardization was employed using two  
72 different standards. For age-adjustment of hypertension prevalence and average BP, the standard  
73 was the average age distribution of all adults across all study cycles, while for age-adjustment of  
74 other outcome measures, the standard was average age distribution of adults with hypertension  
75 across all study cycles. The age categories used for standardization were: 18-44 years, 45-64  
76 years, 65-74 years, and 75 years or older. The proportions used for age-adjustment of all patients  
77 and of hypertension patients for each operational hypertension definition are listed in eTable 2.

78       Secondary outcome measures were the age-adjusted mean SBP and DBP for all patients  
79 and for hypertensive patients, and the age-adjusted proportions of patients who were labelled  
80 with a searchable diagnosis code of hypertension in the EHR during a 2-year cycle. The coded  
81 diagnoses of hypertension and the corresponding OMOP concept identification numbers listed in  
82 eTable 3).

83

#### 84       **Statistical Analysis**

85       Descriptive statistics were used to characterize the overall study population and the  
86 populations from each 2-year cycle, and graphical representations were used to demonstrate  
87 temporal trends. The generalized estimation equation (GEE) method was applied to assess the  
88 predictors of different outcomes while accounting for the fact that multiple observations might  
89 have been available for the same individuals at different cycles. Specifically, an exchangeable  
90 within-person working correlation structure was specified in each GEE model and 95%  
91 confidence intervals were calculated using a robust variance estimator. Models used to evaluate  
92 dichotomous outcomes included a specification for the binomial distribution of the dependent



93 variable, and models used to evaluate continuous outcomes included a specification for the  
94 Gaussian distribution of the dependent variable. The independent variables included cycle, sex,  
95 race and ethnicity, and age group, and each variable was treated as categorical in the GEE model.  
96 To simplify the analysis and avoid multiple comparisons, in the GEE modeling section, we only  
97 used the operational hypertension definition that used BP measurement from a single randomly  
98 chosen visit during a 2-year cycle. All statistical tests were 2-sided, with a level of significance  
99 of 0.05. Data collection using the OMOP model was conducted with the Microsoft SQL Server  
100 and data analysis was performed using R (version 4.2.3). The study was approved by the  
101 Institutional Review Board at Eastern Virginia Medical School. The study was reported  
102 following the STROBE (Strengthening the Reporting of Observational Studies in Epidemiology)  
103 reporting guidelines.<sup>11</sup>

## 104 **Results**

### 105 **Population Characteristics**

106 A total of 1,376,325 unique adults met the overall study inclusion criteria. The  
107 demographics of the overall study population in each 2-year cycle are shown in Table 1. Each 2-  
108 year cycle was analyzed independently, and individual patients could appear in one or more 2-  
109 year cycles, depending on the care they received. Thus, the number of patients in the six 2-year  
110 cycles varied and ranged from 395,859 patients to 631,892 patients per 2-year cycle. The  
111 numbers of outpatient visits and outpatient BP measurements per patient during a 2-year cycle  
112 were relatively constant during the study period. The median number of outpatient visits per  
113 patient was 2 during 2010-2011 and 3 during the remaining 2-year cycles. The median number of  
114 outpatient BP measurements per patient was 5 during 2012-2013 and 2018-2019 and was 4  
115 during the remaining 2-year cycles.

116           Among all patients, the mean age-adjusted SBP ranged from 125.1 to 127.0 mm Hg and  
117 the mean age-adjusted DBP ranged from 74.4 to 76.0 mm Hg (Table 1). Mean SBP and DBP  
118 among all patients showed an upward trend during the time of study.

119

## 120           **Hypertension Prevalence and Disparities**

121           The demographics of the hypertensive patients varied slightly depending on the  
122 operational hypertension definition. The demographics of hypertensive patients (using the  
123 random BP measurement definition, which is comparable to the NHANES study) are shown in  
124 eTable 4.

125           The age-adjusted hypertension prevalence rates over the 12-year study period for each  
126 operational hypertension definition are shown in Figure 1. Depending on the operational  
127 hypertension definition, the hypertension prevalence rates ranged from 36.5% to 50.9% and  
128 prevalence increased by about 5% over the study period regardless of the operational  
129 hypertension definition.

130           Non-Hispanic Black patients consistently showed 12-14% higher age-adjusted  
131 hypertension prevalence rates compared with the non-Hispanic White patients (OR 2.03, [2.02,  
132 2.04],  $P < 0.001$ , Figure 2). Hypertension prevalence rates were progressively higher by age  
133 group, peaking at 80% in patients  $>75$  years old during 2020-2021 (eFigure 1). Men consistently  
134 showed approximately 7% higher hypertension prevalence rates (OR 1.41, [1.40, 1.42],  $P$   
135  $< 0.001$ , eFigure 2).

136           The proportions of hypertensive patients defined by elevated BP only, by use of a first-  
137 line antihypertensive medication only, or by both are shown in eFigure3. For all operational

138 hypertension definitions, the proportions of hypertensive patients defined by medication usage or  
139 combination of medication usage and elevated BP increased during the study period.

140

#### 141 **Blood Pressure Control Rates Among Patients with Hypertension and Disparities**

142 Among patients with hypertension, the age-adjusted BP control rates during the study  
143 period ranged from 61.2% to 73.3%, depending on the operational hypertension definition  
144 (Figure 3). The trend in BP control rates exhibited an initial increase from 2010-2011 to 2014-  
145 2015, followed by a decline in 2016-2017. Thereafter, the control rates rose again from 2018-  
146 2019, only to decline once more in 2020-2021. The age-adjusted BP control rates were  
147 consistently about 3% lower in men (OR 0.89, [0.88, 0.90],  $P < 0.001$ , eFigure 4) and consistently  
148 about 5-7% lower in non-Hispanic Black patients as compared with non-Hispanic White patients  
149 (OR 0.77, [0.76, 0.78],  $P < 0.001$ , eFigure 5).

150 Among hypertension patients, the mean age-adjusted SBP ranged from 132.3 to 135.4  
151 mmHg and mean age-adjusted DBP ranged from 76.8 to 78.8 mmHg (eFigure 6). Mean BP was  
152 relatively unchanged during the study timeframe regardless of the operational hypertension  
153 definition. Age-adjusted mean BP was consistently higher in non-Hispanic Black patients as  
154 compared with other non-Hispanic White patients (SBP: +2.61 [2.55, 2.67]; DBP: +1.31 [1.28,  
155 1.35];  $P < 0.001$  for both, eFigure 7).

156

#### 157 **Coded Diagnosis Rates Among Patients with Hypertension and Disparities**

158 Among patients with hypertension, the age-adjusted proportion of patients labelled in the  
159 EHR with a coded diagnosis of hypertension ranged from 45.5% to 68.6%, again depending on  
160 the operational hypertension definition (Figure 4). The proportion of patients diagnosed with

161 hypertension, as indicated by coded diagnoses, exhibited an initial increase from 2010-2011 to  
162 2014-2015, followed by a decline in 2016-2017. Thereafter, the proportions rose again in 2020-  
163 2021. The proportion of patients with a coded diagnosis of hypertension was highest in  
164 hypertension groups defined by 2 or more BP measurements than in groups defined by the other  
165 definitions. The proportion of patients with hypertension with a coded diagnosis of hypertension  
166 was similar in women and men. Rates of receiving a coded diagnosis were consistently about 5%  
167 higher in non-Hispanic Black patients (OR 1.26 [1.25, 1.27],  $P<0.001$ ) and Asian patients (OR  
168 1.31 [1.28, 1.35],  $P<0.001$ ), compared with White and Hispanic patients (eFigure 8).

169

170

171  
172  
173  
174  
175  
176  
177  
178  
179  
180  
181  
182  
183  
184  
185  
186  
187  
188  
189  
190  
191  
192

## Discussion

In this serial cross-sectional study, we leveraged EHRs of a large health system to analyze regional trends in hypertension using various operational hypertension definitions. We showed a marked increase in age-adjusted hypertension prevalence rates, modest age-adjusted BP control rates, and relatively low but upwardly trending age-adjusted rates of coding hypertension in the EHR during the 12 years of study. In addition, we noted important disparities in age-adjusted hypertension prevalence rates, age-adjusted BP control rates, and age-adjusted mean BP levels that stayed consistent over time. The age-adjusted hypertension prevalence rates were 12-14% higher in non-Hispanic Black patients, 7% higher in men, and progressively higher by age group throughout the study period.

This study demonstrates the ability to observe hypertension trends and disparities at a regional health system level using real-world data, which could greatly facilitate locally designed system-level interventions to address hypertension and racial disparities. We were able to create an agile analytical data platform that enabled a comparison of a variety of operational hypertension definitions and an evaluation of how age, sex, and race/ethnicity affect hypertension trends. Our analytical data platform enabled examination of multiple operational hypertension definitions and we demonstrated substantial differences in outcomes, depending on the sensitivity of the hypertension definition.

Our study demonstrated a steady rise of about 5% in the age-adjusted hypertension prevalence rates throughout the study period, regardless of the operational hypertension definition. Increases in hypertension prevalence rates were seen in all age groups, both sexes, and in all race/ethnicity groups.

193           The average age of patients and the age adjusted mean SBP and DBP increased during  
194 the study period, which may have contributed to the increase in hypertension prevalence rates.  
195 The increase in hypertension prevalence rates did not appear to be artifactually affected by the  
196 frequency of outpatient visits or BP measurements.

197           Our definition of hypertension included whether patients were prescribed first-line  
198 antihypertension medications, which may have also contributed to the increase in hypertension  
199 prevalence rates. The proportion of patients who were defined as hypertensive by the  
200 medication-use criterion increased during the 2012-2013, 2018-2019 and 2020-2021 2-year  
201 cycles, possibly due to changing guidelines for hypertension. The 2017 ACC/AHA published  
202 guidelines recommended a lower BP goal which could have caused more patients to receive first-  
203 line antihypertensive medications and could have affected the hypertension prevalence rates  
204 during 2018-2019 and 2020-2021.<sup>10</sup>

205           The age-adjusted proportion of patients with controlled BP rose from 61-71% in 2010-  
206 2011 to 64-73% in 2014-2015, fell in 2016-2017, rose again to 66-73% in 2018-2019, and fell in  
207 62-68% in 2020-2021. The pattern was consistent among patients defined by all 4 operational  
208 hypertension definitions. Non-Hispanic Blacks had BP control rates that were consistently about  
209 5% lower than Whites. The rise in control rates in all groups during 2018-2019 could be  
210 explained by the 2017 ACC/AHA guideline recommendations for tighter BP control.<sup>10</sup> The fall  
211 in control during 2020-2021 may have been caused by changes in healthcare associated with the  
212 COVID-19 pandemic.

213           The proportion of patients with a coded diagnosis of hypertension among patients with  
214 hypertension increased during the study period except during 2016-2017 and the trends were  
215 similar in all 4 operational hypertension definition groups. There were no differences by sex.

216 Non-Hispanic Blacks and Asians were 6-10% more likely to have a coded diagnosis of  
217 hypertension as compared with other race/ethnicity groups. Interestingly, non-Hispanic Black  
218 patients were significantly more likely to have hypertension by all the operational hypertension  
219 definitions and less likely to have BP controlled, even though they were more likely to have been  
220 labelled in the EHR with a coded diagnosis of hypertension.

221 Our results from a regional health system provide supplemental information to the  
222 national estimates reported by the National Health and Nutrition Examination Survey  
223 (NHANES). Using a comparable operational hypertension definition (a single random visit BP  
224 measurement), our age-adjusted hypertension prevalence rates are higher (41.1% to 46.1%) and  
225 increased steadily as compared with NHANES which reported prevalence rates that were lower  
226 and remained constant (30% to 32%).<sup>2</sup> Our BP control rates (61.2% to 65.9%) were also higher  
227 than those reported by NHANES (31.8% to 53.8%). These differences may be because our study  
228 population was derived from patients exposed to a healthcare system rather than subjects  
229 randomly selected from the general population. Importantly, the proportion of non-Hispanic  
230 Blacks in our study was roughly twice that from the NHANES study, reflecting the  
231 demographics of our region, which may have increased the hypertension prevalence rates.

232 Studies have suggested that hypertension prevalence based on methods using electronic  
233 health records could be underestimated.<sup>12</sup> In our study, we used the EHR, but we defined  
234 hypertension based on measurement of BP, rather than based on the coded diagnosis of  
235 hypertension, which appears to have overcome the potential of under-reporting hypertension  
236 using the EHR.

237 Our hypertension control rates were similar to those reported by the PCORnet Blood  
238 Pressure Control Laboratory, which reported an average BP control rate of 62%.<sup>13</sup> Their findings

239 from 25 health systems showed different demographics than our regional analysis, with Black  
240 patients only comprising 15% of their population, as compared to approximately 30% of the  
241 hypertensive patients in our study. While nationwide studies are informative, limiting the  
242 analysis to a single regional health system may provide actionable insights regarding disparities  
243 that are more relevant locally, based on the demographics of that regional health system.

244 Banerjee et al measured the hypertension coding rate in 251,590 patients defined  
245 hypertension by 2 or more BP readings  $\geq 140/90$  mm Hg and/or antihypertensive medications  
246 prescribed during the study period. Among those patients, the coded diagnosis rate was 62.9%,  
247 very similar to our finding among patients with a comparable operational hypertension  
248 definition.<sup>12</sup>

249 Our study has recognized strengths and limitations. Our approach of analyzing real-world  
250 data from a single health system is practical and feasible, and the results are similar to the  
251 multicenter approach of the PCORnet Blood Pressure Control Laboratory.<sup>14</sup> Our data platform  
252 allows rapid evaluation of populations at scale and could be a source of continuing evaluation  
253 with planned periodic additions to the data base,<sup>15,16</sup> providing a powerful tool for generating  
254 actionable insights from real-world data.<sup>17,18</sup> This data resource is an model of what could be a  
255 useful generator of insights for a learning health system.<sup>19,20</sup>

256 A possible limitation of our study, as compared with the NHANES approach,<sup>2</sup> however,  
257 is that BP was obtained in the usual care setting, rather than through a rigorous protocolized  
258 approach. Although clinicians expect and often demand accurate BP measurements in usual care  
259 settings, the BP measurements in real-world settings may be less accurate than in the  
260 protocolized setting of a prospective research study.<sup>21</sup> Also, the coded diagnosis of hypertension  
261 in the EHR could have been affected by recall bias and other sources of possible coding error.<sup>15</sup>



262 In conclusion, we were able to use real-world EHR data to establish hypertension  
263 prevalence rates, control rates, and diagnostic coding rates in a large population using the EHR  
264 from a large regional health system, showing important trends and opportunities to address racial  
265 disparities. Our study may provide a model for other health systems seeking to improve  
266 hypertension care at a regional health system level and may lead to further research on how to  
267 use real-world data and computational approaches for addressing hypertension.

### 268 **Conflicts of Interest and Financial Disclosures**

269 In the past three years, Dr. Krumholz received expenses and/or personal fees from  
270 UnitedHealth, Element Science, Aetna, Reality Labs, Tesseract/4Catalyst, F-Prime, the  
271 Siegfried and Jensen Law Firm, Arnold and Porter Law Firm, and Martin/Baughman Law  
272 Firm. He is a co-founder of Refactor Health and HugoHealth, and is associated with  
273 contracts, through Yale New Haven Hospital, from the Centers for Medicare & Medicaid  
274 Services and through Yale University from Johnson & Johnson. Dr. Brush receives royalties  
275 from Dementi Milestone Publishing for the book “The Science of the Art of Medicine: A  
276 Guide to Medical Reasoning.” Dr. Schulz received expenses and/or personal fees from  
277 HugoHealth, Abbott, Instrumentation Laboratories, and Detect, Inc., and is a cofounder of  
278 Refactor Health. The other authors report no disclosures.

279

280

281

282  
283  
284  
285  
286  
287  
288  
289  
290  
291  
292  
293  
294  
295  
296  
297  
298  
299  
300  
301  
302  
303

## References

1. Tsao CW, Aday AW, Almarzooq ZI, Alonso A, Beaton AZ, Bittencourt MS, Boehme AK, Buxton AE, Carson AP, Commodore-Mensah Y, Elkind MSV, Evenson KR, Eze-Nliam C, Ferguson JF, Generoso G, Ho JE, Kalani R, Khan SS, Kissela BM, Knutson KL, Levine DA, Lewis TT, Liu J, Loop MS, Ma J, Mussolino ME, Navaneethan SD, Perak AM, Poudel R, Rezk-Hanna M, Roth GA, Schroeder EB, Shah SH, Thacker EL, VanWagner LB, Virani SS, Voecks JH, Wang NY, Yaffe K and Martin SS. Heart Disease and Stroke Statistics-2022 Update: A Report From the American Heart Association. *Circulation*. 2022;145:e153-e639.
2. Muntner P, Hardy ST, Fine LJ, Jaeger BC, Wozniak G, Levitan EB and Colantonio LD. Trends in Blood Pressure Control Among US Adults With Hypertension, 1999-2000 to 2017-2018. *JAMA*. 2020;324:1190-1200.
3. Clark D, 3rd, Colantonio LD, Min YI, Hall ME, Zhao H, Mentz RJ, Shimbo D, Ogedegbe G, Howard G, Levitan EB, Jones DW, Correa A and Muntner P. Population-Attributable Risk for Cardiovascular Disease Associated With Hypertension in Black Adults. *JAMA Cardiol*. 2019;4:1194-1202.
4. Lu Y, Wang Y, Spatz ES, Onuma O, Nasir K, Rodriguez F, Watson KE and Krumholz HM. National Trends and Disparities in Hospitalization for Acute Hypertension Among Medicare Beneficiaries (1999-2019). *Circulation*. 2021;144:1683-1693.
5. Bundy JD, Li C, Stuchlik P, Bu X, Kelly TN, Mills KT, He H, Chen J, Whelton PK and He J. Systolic Blood Pressure Reduction and Risk of Cardiovascular Disease and

- 304 Mortality: A Systematic Review and Network Meta-analysis. *JAMA Cardiol.*  
305 2017;2:775-781.
- 306 6. Go AS, Bauman MA, Coleman King SM, Fonarow GC, Lawrence W, Williams KA  
307 and Sanchez E. An effective approach to high blood pressure control: a science  
308 advisory from the American Heart Association, the American College of Cardiology,  
309 and the Centers for Disease Control and Prevention. *J Am Coll Cardiol.*  
310 2014;63:1230-1238.
- 311 7. Jaffe MG, Lee GA, Young JD, Sidney S and Go AS. Improved blood pressure control  
312 associated with a large-scale hypertension program. *JAMA.* 2013;310:699-705.
- 313 8. Lu Y, Huang C, Mahajan S, Schulz WL, Nasir K, Spatz ES and Krumholz HM.  
314 Leveraging the Electronic Health Records for Population Health: A Case Study of  
315 Patients With Markedly Elevated Blood Pressure. *J Am Heart Assoc.*  
316 2020;9:e015033.
- 317 9. Hripesak G, Duke JD, Shah NH, Reich CG, Huser V, Schuemie MJ, Suchard MA,  
318 Park RW, Wong IC, Rijnbeek PR, van der Lei J, Pratt N, Noren GN, Li YC, Stang  
319 PE, Madigan D and Ryan PB. Observational Health Data Sciences and Informatics  
320 (OHDSI): Opportunities for Observational Researchers. *Stud Health Technol Inform.*  
321 2015;216:574-8.
- 322 10. Whelton PK, Carey RM, Aronow WS, Casey DE, Jr., Collins KJ, Dennison  
323 Himmelfarb C, DePalma SM, Gidding S, Jamerson KA, Jones DW, MacLaughlin EJ,  
324 Muntner P, Ovbiagele B, Smith SC, Jr., Spencer CC, Stafford RS, Taler SJ, Thomas  
325 RJ, Williams KA, Sr., Williamson JD and Wright JT, Jr. 2017  
326 ACC/AHA/AAPA/ABC/ACPM/AGS/APhA/ASH/ASPC/NMA/PCNA Guideline for

- 327 the Prevention, Detection, Evaluation, and Management of High Blood Pressure in  
328 Adults: A Report of the American College of Cardiology/American Heart Association  
329 Task Force on Clinical Practice Guidelines. *J Am Coll Cardiol*. 2018;71:e127-e248.
- 330 11. Von Elm E, Altman DG, Egger M, Pocock SJ, Gøtzsche PC, Vandenbroucke JP and  
331 Initiative S. The Strengthening the Reporting of Observational Studies in  
332 Epidemiology (STROBE) Statement: guidelines for reporting observational studies.  
333 *International journal of surgery*. 2014;12:1495-1499.
- 334 12. Banerjee D, Chung S, Wong EC, Wang EJ, Stafford RS and Palaniappan LP.  
335 Underdiagnosis of hypertension using electronic health records. *Am J Hypertens*.  
336 2012;25:97-102.
- 337 13. Cooper-DeHoff RM, Fontil V, Carton T, Chamberlain AM, Todd J, O'Brien EC,  
338 Shaw KM, Smith M, Choi S, Nilles EK, Ford D, Tecson KM, Dennar PE, Ahmad F,  
339 Wu S, McClay JC, Azar K, Singh R, Faulkner Modrow M, Shay CM, Rakotz M,  
340 Wozniak G and Pletcher MJ. Tracking Blood Pressure Control Performance and  
341 Process Metrics in 25 US Health Systems: The PCORnet Blood Pressure Control  
342 Laboratory. *J Am Heart Assoc*. 2021;10:e022224.
- 343 14. Pletcher MJ, Fontil V, Carton T, Shaw KM, Smith M, Choi S, Todd J, Chamberlain  
344 AM, O'Brien EC, Faulkner M, Maeztu C, Wozniak G, Rakotz M, Shay CM and  
345 Cooper-DeHoff RM. The PCORnet Blood Pressure Control Laboratory: A Platform  
346 for Surveillance and Efficient Trials. *Circ Cardiovasc Qual Outcomes*.  
347 2020;13:e006115.

- 348 15. Casey JA, Schwartz BS, Stewart WF and Adler NE. Using Electronic Health Records  
349 for Population Health Research: A Review of Methods and Applications. *Annu Rev*  
350 *Public Health*. 2016;37:61-81.
- 351 16. Schulz WL, Kvedar JC and Krumholz HM. Agile analytics to support rapid  
352 knowledge pipelines. *NPJ Digit Med*. 2020;3:108.
- 353 17. Krumholz HM. Big data and new knowledge in medicine: the thinking, training, and  
354 tools needed for a learning health system. *Health Aff (Millwood)*. 2014;33:1163-70.
- 355 18. Krumholz HM. Inflection Point: Ideas for Accelerating Breakthroughs and Improving  
356 Cardiovascular Health. *Circ Cardiovasc Qual Outcomes*. 2020;13:e007615.
- 357 19. Greene SM, Reid RJ and Larson EB. Implementing the learning health system: from  
358 concept to action. *Ann Intern Med*. 2012;157:207-10.
- 359 20. Foraker RE, Benziger CP, DeBarmore BM, Cene CW, Loustalot F, Khan Y,  
360 Anderson CAM, Roger VL, American Heart Association Council on E, Prevention,  
361 Council on Arteriosclerosis T, Vascular B, Council on L and Cardiometabolic H.  
362 Achieving Optimal Population Cardiovascular Health Requires an Interdisciplinary  
363 Team and a Learning Healthcare System: A Scientific Statement From the American  
364 Heart Association. *Circulation*. 2021;143:e9-e18.
- 365 21. Muntner P, Shimbo D, Carey RM, Charleston JB, Gaillard T, Misra S, Myers MG,  
366 Ogedegbe G, Schwartz JE, Townsend RR, Urbina EM, Viera AJ, White WB and  
367 Wright JT, Jr. Measurement of Blood Pressure in Humans: A Scientific Statement  
368 From the American Heart Association. *Hypertension*. 2019;73:e35-e66.

369  
370

371 **Table 1.** Demographic characteristics and mean systolic blood pressure (SBP) and mean  
 372 diastolic blood pressure (DBP) of all patients in each 2-year cycle.

| 2-year Cycle       | 2010-2011        | 2012-2013        | 2014-2015        | 2016-2017        | 2018-2019        | 2020-2021        |
|--------------------|------------------|------------------|------------------|------------------|------------------|------------------|
| Patients           | 395,859          | 429,754          | 466,692          | 631,892          | 608,497          | 619,023          |
| Sex                |                  |                  |                  |                  |                  |                  |
| Female             | 231,203<br>(58%) | 254,610<br>(59%) | 275,386<br>(59%) | 370,352<br>(59%) | 355,759<br>(58%) | 362,140<br>(59%) |
| Male               | 164,625<br>(42%) | 175,130<br>(41%) | 191,306<br>(41%) | 261,540<br>(41%) | 252,736<br>(42%) | 256,874<br>(41%) |
| Race/Ethnicity     |                  |                  |                  |                  |                  |                  |
| Non-Hispanic Black | 99,779<br>(25%)  | 109,183<br>(25%) | 122,477<br>(26%) | 142,447<br>(23%) | 135,880<br>(22%) | 146,162<br>(24%) |
| Non-Hispanic White | 259,665<br>(66%) | 282,167<br>(66%) | 305,112<br>(65%) | 438,170<br>(69%) | 423,892<br>(70%) | 423,186<br>(68%) |
| Hispanic/Latino    | 7,342<br>(1.9%)  | 11,549<br>(2.7%) | 13,060<br>(2.8%) | 19,449<br>(3.1%) | 19,691<br>(3.2%) | 21,297<br>(3.4%) |
| Asian              | 7,616<br>(1.9%)  | 9,294<br>(2.2%)  | 10,406<br>(2.2%) | 12,698<br>(2.0%) | 12,834<br>(2.1%) | 13,363<br>(2.2%) |
| Unknown            | 21,457<br>(5.4%) | 17,561<br>(4.1%) | 15,637<br>(3.4%) | 19,128<br>(3.0%) | 16,200<br>(2.7%) | 15,015<br>(2.4%) |
| Mean Age (SD)      | 51.0 (18.1)      | 51.5 (18.2)      | 52.3 (18.2)      | 52.9 (18.4)      | 54.6 (18.2)      | 55.3 (18.2)      |
| Age Group          |                  |                  |                  |                  |                  |                  |
| 18-44              | 142,539<br>(36%) | 151,749<br>(35%) | 158,628<br>(34%) | 210,073<br>(33%) | 182,608<br>(30%) | 181,485<br>(29%) |
| 45-64              | 156,016<br>(39%) | 165,571<br>(39%) | 178,135<br>(38%) | 234,314<br>(37%) | 224,434<br>(37%) | 221,173<br>(36%) |
| 65-74              | 54,364<br>(14%)  | 64,801<br>(15%)  | 76,065<br>(16%)  | 109,058<br>(17%) | 114,851<br>(19%) | 124,125<br>(20%) |
| >75                | 42,940<br>(11%)  | 47,633<br>(11%)  | 53,864<br>(12%)  | 78,447<br>(12%)  | 86,604<br>(14%)  | 92,240<br>(15%)  |
| Mean SBP (SD)      | 125.2 (14.9)     | 124.8 (14.8)     | 125.1 (14.8)     | 126.1 (14.8)     | 126.1 (14.2)     | 127.5 (14.6)     |
| Mean DBP (SD)      | 74.7 (9.4)       | 74.4 (9.2)       | 74.7 (9.1)       | 75.5 (9.0)       | 75.3 (8.7)       | 75.8 (8.8)       |

373 SD=standard deviation

374

375

## Figures

376 **Figure 1.** Age-adjusted hypertension prevalence rates in each 2-year cycle by operational

377 hypertension definition.

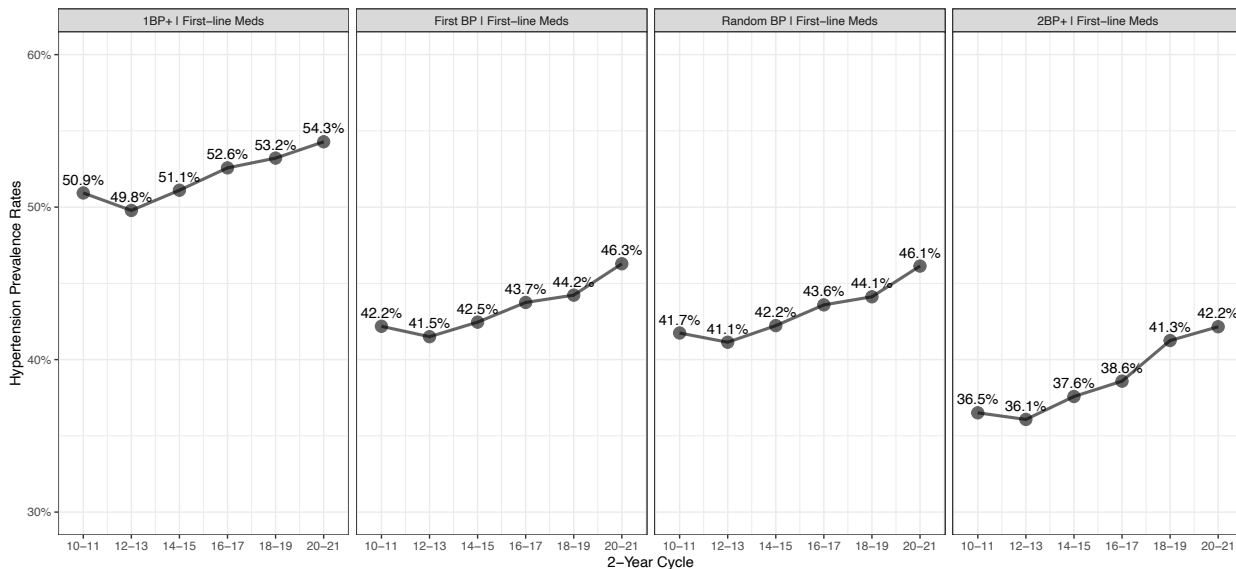

378

379 1BP+ = 1 elevated blood pressure (BP) measurement, 2BP+ = at least 2 elevated measurements.

380

381

382 **Figure 2.** Age-adjusted hypertension prevalence rates by race/ethnicity in each 2-year cycle by

383 operational hypertension definition.

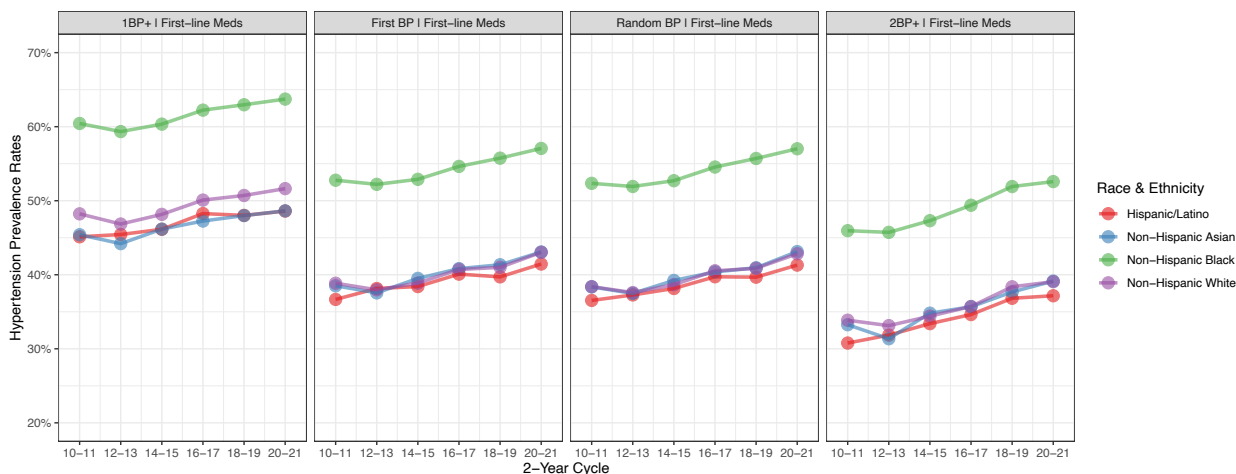

384

385 1BP+ = 1 elevated blood pressure (BP) measurement, 2BP+ = at least 2 elevated measurements.

386

387 **Figure 3.** Age-adjusted blood pressure control rates in each 2-year cycle by operational  
 388 hypertension definition.

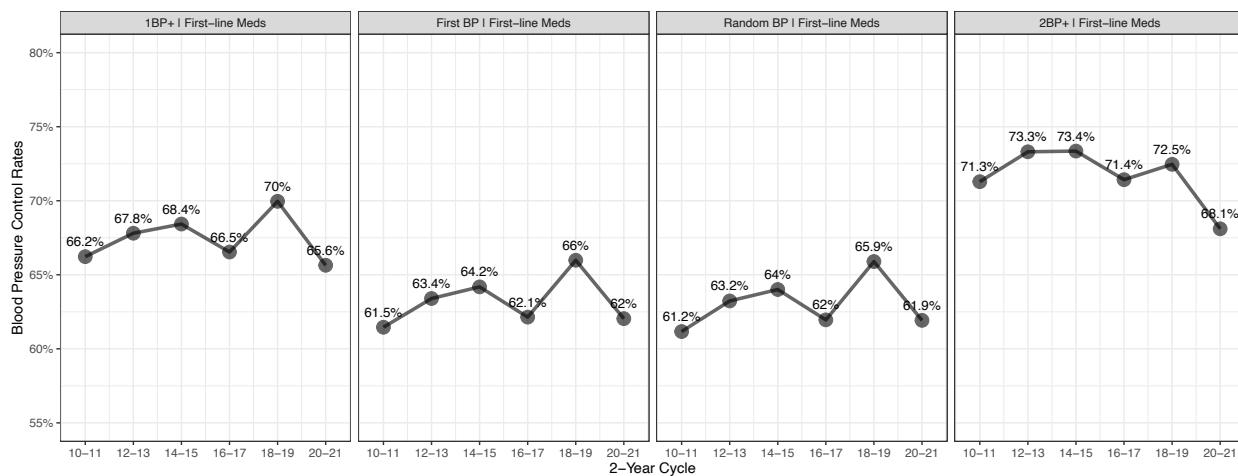

389  
 390 1BP+ = 1 elevated blood pressure (BP) measurement, 2BP+ = at least 2 elevated measurements.  
 391

392

393 **Figure 4.** Age-adjusted hypertension coding rates in each 2-year cycle by operational

394 hypertension definition.

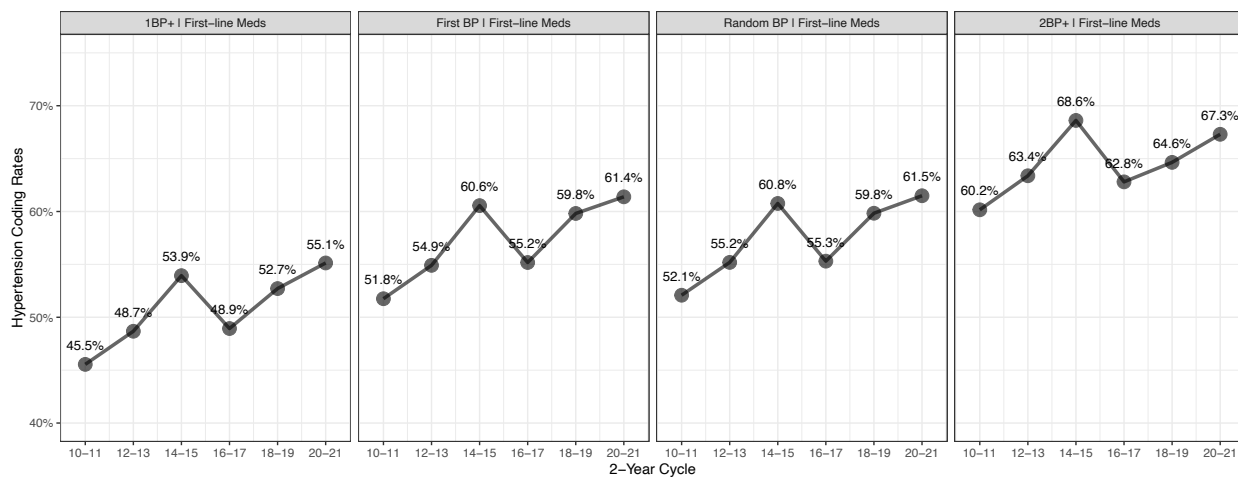

395  
 396 1BP+ = 1 elevated blood pressure (BP) measurement, 2BP+ = at least 2 elevated measurements.  
 397
